# Supplementary material
Source: MDPI journal article supplement (https://www.mdpi.com/2813-3145/2/2/12)
Supplement: s1 [file s1]

**Multiple resistance in rust-red flour beetle (*Tribolium castaneum* Herbst) from northern Nigeria is probably driven by metabolic mechanisms**

**Supplementary File: Fragment of the voltage-gated sodium channel encompassing the IIS4-IIS6 transmembrane domain, harboring the T929I and L1014F mutations**

>Tcast\_cyperm\_alive 1

```
CCGACTGTTGAGGGTTTTTAAACTGGCAAAGTCGTGGCCAACCTTGAACCTTACTCATCTCCATTATGGGCAGGACGATG
GGGGCTTTGGGGAATCTAACGTTTGTCTTGTGCATCATCATATTCATATTTGCCGTAATGGGGATGCAACTATTTGGGA
AAAACTATACAGGTAGACGCATTCAACTACTCGTTACCAAACGACAAAAATAAAAAATTCCAGATAACGTTGATAG
ATTTCCCGACCACGAACTTCCAAGGTGGAACCTTACCGATTTTATGCATTCCCTTTATGATAGTGTTTAGAGTACTGTGTG
GAGAGTGGATAGAATCTATGTGGGATTGCATGTTAGTAGGTGATGTGTCTTGTATTCCATTCTTCCTAGCAACTGTGGT
AATTGGTAATCTTGTGGTACGTATCTCCCAACCACTCGCACCTGTGTTACATGAGGTGCTCCAGGTACTGAACCTCTTCT
TGGCTCTGCTTTTGTAGCAACTTTGGCTCTTCAAACCTCTCAGCACCGACTGCCGACAACGACACTAATAAAATAGC
```

>Tcast\_cyperm\_alive 2

```
CCGACTGTTGAGGGTTTTTAAACTGGCAAAGTCGTGGCCAACCTTGAACCTTACTCATCTCCATTATGGGCAGGACGATG
GGGGCTTTGGGGAATCTAACGTTTGTCTTGTGCATCATCATATTCATATTTGCCGTAATGGGGATGCAACTATTTGGGA
AAAACTATACAGGTAGACGCATTCAACTACTCGTTACCAAACGACAAAAATAAAAAATTCCAGATAACGTTGATAG
ATTTCCCGACCACGAACTTCCAAGGTGGAACCTTACCGATTTTATGCATTCCCTTTATGATAGTGTTTAGAGTACTGTGTG
GAGAGTGGATAGAATCTATGTGGGATTGCATGTTAGTAGGTGATGTGTCTTGTATTCCATTCTTCCTAGCAACTGTGGT
AATTGGTAATCTTGTGGTACGTATCTCCCAACCACTCGCACCTGTGTTACATGAGGTGCTCCAGGTACTGAACCTCTTCT
TGGCTCTGCTTTTGTAGCAACTTTGGCTCTTCAAACCTCTCAGCACCGACTGCCGACAACGACACTAATAAAATAGC
```

>Tcast\_cyperm\_alive 3

```
CCGACTGTTGAGGGTTTTTAAACTGGCAAAGTCGTGGCCAACCTTGAACCTTACTCATCTCCATTATGGGCAGGACGATG
GGGGCTTTGGGGAATCTAACGTTTGTCTTGTGCATCATCATATTCATATTTGCCGTAATGGGGATGCAACTATTTGGGA
AAAACTATACAGGTAGACGCATTCAACTACTCGTTACCAAACGACAAAAATAAAAAATTCCAGATAACGTTGATAG
ATTTCCCGACCACGAACTTCCAAGGTGGAACCTTACCGATTTTATGCATTCCCTTTATGATAGTGTTTAGAGTACTGTGTG
GAGAGTGGATAGAATCTATGTGGGATTGCATGTTAGTAGGTGATGTGTCTTGTATTCCATTCTTCCTAGCAACTGTGGT
AATTGGTAATCTTGTGGTACGTATCTCCCAACCACTCGCACCTGTGTTACATGAGGTGCTCCAGGTACTGAACCTCTTCT
TGGCTCTGCTTTTGTAGCAACTTTGGCTCTTCAAACCTCTCAGCACCGACTGCCGACAACGACACTAATAAAATAGC
```

>Tcast\_cyperm\_alive 4

```
CCGACTGTTGAGGGTTTTTAAACTGGCAAAGTCGTGGCCAACCTTGAACCTTACTCATCTCCATTATGGGCAGGACGATG
GGGGCTTTGGGGAATCTAACGTTTGTCTTGTGCATCATCATATTCATATTTGCCGTAATGGGGATGCAACTATTTGGGA
AAAACTATACAGGTAGACGCATTCAACTACTCGTTACCAAACGACAAAAATAAAAAATTCCAGATAACGTTGATAG
ATTTCCCGACCACGAACTTCCAAGGTGGAACCTTACCGATTTTATGCATTCCCTTTATGATAGTGTTTAGAGTACTGTGTG
GAGAGTGGATAGAATCTATGTGGGATTGCATGTTAGTAGGTGATGTGTCTTGTATTCCATTCTTCCTAGCAACTGTGGT
AATTGGTAATCTTGTGGTACGTATCTCCCAACCACTCGCACCTGTGTTACATGAGGTGCTCCAGGTACTGAACCTCTTCT
TGGCTCTGCTTTTGTAGCAACTTTGGCTCTTCAAACCTCTCAGCACCGACTGCCGACAACGACACTAATAAAATAGC
```

>Tcast\_cyperm\_alive 5

```
CCGACTGTTGAGGGTTTTTAAACTGGCAAAGTCGTGGCCAACCTTGAACCTTACTCATCTCCATTATGGGCAGGACGATG
GGGGCTTTGGGGAATCTAACGTTTGTCTTGTGCATCATCATATTCATATTTGCCGTAATGGGGATGCAACTATTTGGGA
AAAACTATACAGGTAGACGCATTCAACTACTCGTTACCAAACGACAAAAATAAAAAATTCCAGATAACGTTGATAG
ATTTCCCGACCACGAACTTCCAAGGTGGAACCTTACCGATTTTATGCATTCCCTTTATGATAGTGTTTAGAGTACTGTGTG
GAGAGTGGATAGAATCTATGTGGGATTGCATGTTAGTAGGTGATGTGTCTTGTATTCCATTCTTCCTAGCAACTGTGGT
AATTGGTAATCTTGTGGTACGTATCTCCCAACCACTCGCACCTGTGTTACATGAGGTGCTCCAGGTACTGAACCTCTTCT
TGGCTCTGCTTTTGTAGCAACTTTGGCTCTTCAAACCTCTCAGCACCGACTGCCGACAACGACACTAATAAAATAGC
```

>Tcast\_cyperm\_alive 6

```
CCGACTGTTGAGGGTTTTTAAACTGGCAAAGTCGTGGCCAACCTTGAACCTTACTCATCTCCATTATGGGCAGGACGATG
GGGGCTTTGGGGAATCTAACGTTTGTCTTGTGCATCATCATATTCATATTTGCCGTAATGGGGATGCAACTATTTGGGA
AAAACTATACAGGTAGACGCATTCAACTACTCGTTACCAAACGACAAAAATAAAAAATTCCAGATAACGTTGATAG
ATTTCCCGACCACGAACTTCCAAGGTGGAACCTTACCGATTTTATGCATTCCCTTTATGATAGTGTTTAGAGTACTGTGTG
GAGAGTGGATAGAATCTATGTGGGATTGCATGTTAGTAGGTGATGTGTCTTGTATTCCATTCTTCCTAGCAACTGTGGT
```

AATTGGTAATCTTGTGGTACGTATCTCCCAACCACTCGCACCTGTGTTACATGAGGTGCTCCAGGTACTGAACCTCTTCT  
TGGCTCTGCTTTTGAGCAACTTTGGCTCTTCAAACCTCTCAGCACCGACTGCCGACAACGACACTAAAAAATAGC

>Tcast\_cyperm\_alive 7

CCGACTGTTGAGGGTTTTTAAACTGGCAAAGTCGTGGCCAACCTTGAACCTTACTCATCTCCATTATGGGCAGGACGATG  
GGGGCTTTGGGGAATCTAACGTTTGTCTTGTGCATCATCATATTCATATTTGCCGTAATGGGGATGCAACTATTTGGGA  
AAAACTATACAGGTAGACGCATTCAACTACTCGTTACCAAACGACAAAAATAAAAAATTCCAGATAACGTTGATAG  
ATTTCCCGACCACGAACCTTCCAAGGTGGAACCTTACCGATTTTATGCATTCCTTTATGATAGTGTTTAGAGTACTGTGTG  
GAGAGTGGATAGAATCTATGTGGGATTGCATGTTAGTAGGTGATGTGTCTTGTATTCCATTCTTCCTAGCAACTGTGGT  
AATTGGTAATCTTGTGGTACGTATCTCCCAACCACTCGCACCTGTGTTACATGAGGTGCTCCAGGTACTGAACCTCTTCT  
TGGCTCTGCTTTTGAGCAACTTTGGCTCTTCAAACCTCTCAGCACCGACTGCCGACAACGACACTAAAAAATAGC

>Tcast\_cyperm\_alive 8

CCGACTGTTGAGGGTTTTTAAACTGGCAAAGTCGTGGCCAACCTTGAACCTTACTCATCTCCATTATGGGCAGGACGATG  
GGGGCTTTGGGGAATCTAACGTTTGTCTTGTGCATCATCATATTCATATTTGCCGTAATGGGGATGCAACTATTTGGGA  
AAAACTATACAGGTAGACGCATTCAACTACTCGTTACCAAACGACAAAAATAAAAAATTCCAGATAACGTTGATAG  
ATTTCCCGACCACGAACCTTCCAAGGTGGAACCTTACCGATTTTATGCATTCCTTTATGATAGTGTTTAGAGTACTGTGTG  
GAGAGTGGATAGAATCTATGTGGGATTGCATGTTAGTAGGTGATGTGTCTTGTATTCCATTCTTCCTAGCAACTGTGGT  
AATTGGTAATCTTGTGGTACGTATCTCCCAACCACTCGCACCTGTGTTACATGAGGTGCTCCAGGTACTGAACCTCTTCT  
TGGCTCTGCTTTTGAGCAACTTTGGCTCTTCAAACCTCTCAGCACCGACTGCCGACAACGACACTAAAAAATAGC

>Tcast\_cyperm\_alive 9

CCGACTGTTGAGGGTTTTTAAACTGGCAAAGTCGTGGCCAACCTTGAACCTTACTCATCTCCATTATGGGCAGGACGATG  
GGGGCTTTGGGGAATCTAACGTTTGTCTTGTGCATCATCATATTCATATTTGCCGTAATGGGGATGCAACTATTTGGGA  
AAAACTATACAGGTAGACGCATTCAACTACTCGTTACCAAACGACAAAAATAAAAAATTCCAGATAACGTTGATAG  
ATTTCCCGACCACGAACCTTCCAAGGTGGAACCTTACCGATTTTATGCATTCCTTTATGATAGTGTTTAGAGTACTGTGTG  
GAGAGTGGATAGAATCTATGTGGGATTGCATGTTAGTAGGTGATGTGTCTTGTATTCCATTCTTCCTAGCAACTGTGGT  
AATTGGTAATCTTGTGGTACGTATCTCCCAACCACTCGCACCTGTGTTACATGAGGTGCTCCAGGTACTGAACCTCTTCT  
TGGCTCTGCTTTTGAGCAACTTTGGCTCTTCAAACCTCTCAGCACCGACTGCCGACAACGACACTAAAAAATAGC

>Tcast\_cyperm\_dead 1

CCGACTGTTGAGGGTTTTTAAACTGGCAAAGTCGTGGCCAACCTTGAACCTTACTCATCTCCATTATGGGCAGGACGATG  
GGGGCTTTGGGGAATCTAACGTTTGTCTTGTGCATCATCATATTCATATTTGCCGTAATGGGGATGCAACTATTTGGGA  
AAAACTATACAGGTAGACGCATTCAACTACTCGTTACCAAACGACAAAAATAAAAAATTCCAGATAACGTTGATAG  
ATTTCCCGACCACGAACCTTCCAAGGTGGAACCTTACCGATTTTATGCATTCCTTTATGATAGTGTTTAGAGTACTGTGTG  
GAGAGTGGATAGAATCTATGTGGGATTGCATGTTAGTAGGTGATGTGTCTTGTATTCCATTCTTCCTAGCAACTGTGGT  
AATTGGTAATCTTGTGGTACGTATCTCCCAACCACTCGCACCTGTGTTACATGAGGTGCTCCAGGTACTGAACCTCTTCT  
TGGCTCTGCTTTTGAGCAACTTTGGCTCTTCAAACCTCTCAGCACCGACTGCCGACAACGACACTAATAAAATAGC

>Tcast\_cyperm\_dead 2

CCGACTGTTGAGGGTTTTTAAACTGGCAAAGTCGTGGCCAACCTTGAACCTTACTCATCTCCATTATGGGCAGGACGATG  
GGGGCTTTGGGGAATCTAACGTTTGTCTTGTGCATCATCATATTCATATTTGCCGTAATGGGGATGCAACTATTTGGGA  
AAAACTATACAGGTAAACGCATTCAACTACTCGTTACCAAACGACAAAAATAAAAAATTCCAGATAACGTTGATAG  
ATTTCCCGACCACGAACCTTCCAAGGTGGAACCTTACCGATTTTATGCATTCCTTTATGATAGTGTTTAGAGTACTGTGTG  
GAGAGTGGATAGAATCTATGTGGGATTGCATGTTAGTAGGTGATGTGTCTTGTATTCCATTCTTCCTAGCAACTGTGGT  
AATTGGTAATCTTGTGGTACGTATCTCCCAACCACTCGCACCTGTGTTACATGAGGTGCTCCAGGTACTGAACCTCTTCT  
TGGCTCTGCTTTTGAGCAACTTTGGCTCTTCAAACCTCTCAGCACCGACTGCCGACAACGACACTAATAAAATAGC

>Tcast\_cyperm\_dead 3

CCGACTGTTGAGGGTTTTTAAACTGGCAAAGTCGTGGCCAACCTTGAACCTTACTCATCTCCATTATGGGCAGGACGATG  
GGGGCTTTGGGGAATCTAACGTTTGTCTTGTGCATCATCATATTCATATTTGCCGTAATGGGGATGCAACTATTTGGGA  
AAAACTATACAGGTAAACGCATTCAACTACTCGTTACCAAACGACAAAAATAAAAAATTCCAGATAACGTTGATAG  
ATTTCCCGACCACGAACCTTCCAAGGTGGAACCTTACCGATTTTATGCATTCCTTTATGATAGTGTTTAGAGTACTGTGTG  
GAGAGTGGATAGAATCTATGTGGGATTGCATGTTAGTAGGTGATGTGTCTTGTATTCCATTCTTCCTAGCAACTGTGGT  
AATTGGTAATCTTGTGGTACGTATCTCCCAACCACTCGCACCTGTGTTACATGAGGTGCTCCAGGTACTGAACCTCTTCT  
TGGCTCTGCTTTTGAGCAACTTTGGCTCTTCAAACCTCTCAGCACCGACTGCCGACAACGACACTAATAAAATAGC

>Tcast\_cyperm\_dead 4

CCGACTGTTGAGGGTTTTTAAACTGGCAAAGTCGTGGCCAACCTTGAACCTTACTCATCTCCATTATGGGCAGGACGATG  
GGGGCTTTGGGGAATCTAACGTTTGTCTTGTGCATCATCATATTCATATTTGCCGTAATGGGGATGCAACTATTTGGGA  
AAAACCTATACAGGTAGACGCATTCAACTACTCGTTACCAAACGACAAAAATAAAAAATTCCAGATAACGTTGATAG  
ATTTCCCGACCACGAACTTCCAAGGTGGAACCTTACCGATTTTATGCATTCCTTTATGATAGTGTTAGAGTACTGTGTG  
GAGAGTGGATAGAATCTATGTGGGATTGCATGTTAGTAGGTGATGTGTCTTGTATTCCATTCTCCTAGCAACTGTGGT  
AATTGGTAATCTTGTGGTACGTATCTCCCAACCACTCGCACCTGTGTTACATGAGGTGCTCCAGGTACTGAACCTCTTCT  
TGGCTCTGCTTTTGAGCAACTTTGGCTCTTCAAACCTCTCAGCACCGACTGCCGACAACGACACTAAAAAATAGC

>Tcast\_cyperm\_dead 5

CCGACTGTTGAGGGTTTTTAAACTGGCAAAGTCGTGGCCAACCTTGAACCTTACTCATCTCCATTATGGGCAGGACGATG  
GGGGCTTTGGGGAATCTAACGTTTGTCTTGTGCATCATCATATTCATATTTGCCGTAATGGGGATGCAACTATTTGGGA  
AAAACCTATACAGGTAAACGCATTCAACTACTCGTTACCAAACGACAAAAATAAAAAATTCCAGATAACGTTGATAG  
ATTTCCCGACCACGAACTTCCAAGGTGGAACCTTACCGATTTTATGCATTCCTTTATGATAGTGTTAGAGTACTGTGTG  
GAGAGTGGATAGAATCTATGTGGGATTGCATGTTAGTAGGTGATGTGTCTTGTATTCCATTCTCCTAGCAACTGTGGT  
AATTGGTAATCTTGTGGTACGTATCTCCCAACCACTCGCACCTGTGTTACATGAGGTGCTCCAGGTACTGAACCTCTTCT  
TGGCTCTGCTTTTGAGCAACTTTGGCTCTTCAAACCTCTCAGCACCGACTGCCGACAACGACACTAATAAAATAGC

>Tcast\_cyperm\_dead 6

CCGACTGTTGAGGGTTTTTAAACTGGCAAAGTCGTGGCCAACCTTGAACCTTACTCATCTCCATTATGGGCAGGACGATG  
GGGGCTTTGGGGAATCTAACGTTTGTCTTGTGCATCATCATATTCATATTTGCCGTAATGGGGATGCAACTATTTGGGA  
AAAACCTATACAGGTAGACGCATTCAACTACTCGTTACCAAACGACAAAAATAAAAAATTCCAGATAACGTTGATAG  
ATTTCCCGACCACGAACTTCCAAGGTGGAACCTTACCGATTTTATGCATTCCTTTATGATAGTGTTAGAGTACTGTGTG  
GAGAGTGGATAGAATCTATGTGGGATTGCATGTTAGTAGGTGATGTGTCTTGTATTCCATTCTCCTAGCAACTGTGGT  
AATTGGTAATCTTGTGGTACGTATCTCCCAACCACTCGCACCTGTGTTACATGAGGTGCTCCAGGTACTGAACCTCTTCT  
TGGCTCTGCTTTTGAGCAACTTTGGCTCTTCAAACCTCTCAGCACCGACTGCCGACAACGACACTAATAAAATAGC

>Tcast\_cyperm\_dead 7

CCGACTGTTGAGGGTTTTTAAACTGGCAAAGTCGTGGCCAACCTTGAACCTTACTCATCTCCATTATGGGCAGGACGATG  
GGGGCTTTGGGGAATCTAACGTTTGTCTTGTGCATCATCATATTCATATTTGCCGTAATGGGGATGCAACTATTTGGGA  
AAAACCTATACAGGTAGACGCATTCAACTACTCGTTACCAAACGACAAAAATAAAAAATTCCAGATAACGTTGATAG  
ATTTCCCGACCACGAACTTCCAAGGTGGAACCTTACCGATTTTATGCATTCCTTTATGATAGTGTTAGAGTACTGTGTG  
GAGAGTGGATAGAATCTATGTGGGATTGCATGTTAGTAGGTGATGTGTCTTGTATTCCATTCTCCTAGCAACTGTGGT  
AATTGGTAATCTTGTGGTACGTATCTCCCAACCACTCGCACCTGTGTTACATGAGGTGCTCCAGGTACTGAACCTCTTCT  
TGGCTCTGCTTTTGAGCAACTTTGGCTCTTCAAACCTCTCAGCACCGACTGCCGACAACGACACTAATAAAATAGC

>Tcast\_cyperm\_dead 8

CCGACTGTTGAGGGTTTTTAAACTGGCAAAGTCGTGGCCAACCTTGAACCTTACTCATCTCCATTATGGGCAGGACGATG  
GGGGCTTTGGGGAATCTAACGTTTGTCTTGTGCATCATCATATTCATATTTGCCGTAATGGGGATGCAACTATTTGGGA  
AAAACCTATACAGGTAGACGCATTCAACTACTCGTTACCAAACGACAAAAATAAAAAATTCCAGATAACGTTGATAG  
ATTTCCCGACCACGAACTTCCAAGGTGGAACCTTACCGATTTTATGCATTCCTTTATGATAGTGTTAGAGTACTGTGTG  
GAGAGTGGATAGAATCTATGTGGGATTGCATGTTAGTAGGTGATGTGTCTTGTATTCCATTCTCCTAGCAACTGTGGT  
AATTGGTAATCTTGTGGTACGTATCTCCCAACCACTCGCACCTGTGTTACATGAGGTGCTCCAGGTACTGAACCTCTTCT  
TGGCTCTGCTTTTGAGCAACTTTGGCTCTTCAAACCTCTCAGCACCGACTGCCGACAACGACACTAATAAAATAGC

>Tcast\_cyperm\_dead 9

CCGACTGTTGAGGGTTTTTAAACTGGCAAAGTCGTGGCCAACCTTGAACCTTACTCATCTCCATTATGGGCAGGACGATG  
GGGGCTTTGGGGAATCTAACGTTTGTCTTGTGCATCATCATATTCATATTTGCCGTAATGGGGATGCAACTATTTGGGA  
AAAACCTATACAGGTAAACGCATTCAACTACTCGTTACCAAACGACAAAAATAAAAAATTCCAGATAACGTTGATAG  
ATTTCCCGACCACGAACTTCCAAGGTGGAACCTTACCGATTTTATGCATTCCTTTATGATAGTGTTAGAGTACTGTGTG  
GAGAGTGGATAGAATCTATGTGGGATTGCATGTTAGTAGGTGATGTGTCTTGTATTCCATTCTCCTAGCAACTGTGGT  
AATTGGTAATCTTGTGGTACGTATCTCCCAACCACTCGCACCTGTGTTACATGAGGTGCTCCAGGTACTGAACCTCTTCT  
TGGCTCTGCTTTTGAGCAACTTTGGCTCTTCAAACCTCTCAGCACCGACTGCCGACAACGACACTAATAAAATAGC
